# Supplementary material for: Stability of Acid Black 210 dye in Tannery Industry Effluent in Aqueous Solution Is Limited and Generates Harmful Subproducts
Source: Frontiers journal article supplement (doi:10.3389/fenvs.2022.750647), 2022-02-25
Supplement: Data_Sheet_1.docx [file Data_Sheet_1.docx]

**Stability of Acid Black 210 dye in tannery industry effluent in aqueous solution is limited and generates harmful subproducts**

Elisa Maria Christovama, Jefferson Honorio Francob*, Guilherme Julião Zocoloc, Ana Marisa Fusco Almeidad, Monica Yonashiro Marcelinod, Danielle Palma de Oliveirae, Maria Valnice Boldrin Zanonia

aInstitute of Chemistry, State University “Julio de Mesquita Filho” - UNESP - Avenida Professor Francisco Degni, 55, Quitandinha, 14800-900, Araraquara-SP, Brazil;

bDepartment of Chemistry, Faculty of Philosophy Sciences and Letters at Ribeirão Preto, University of São Paulo, 14040-901, Ribeirão Preto-SP, Brazil;

cEmbrapa Agroindústria Tropical, Fortaleza-CE, Brazil;

dDepartamento de Análises Clínicas, Faculdade de Ciências Farmacêuticas, State University “Julio de Mesquita Filho” - UNESP – Rua Expecionários do Brasil, 1621, Araraquara-SP, Brazil;

Faculdade de Ciências Farmacêuticas, University of São Paulo, Av. Prof. Lineu Prestes, 580, 05508-900, São Paulo-SP, Brazil

***** Author to whom correspondence should be addressed; e-mail: jeffersonhfranco@gmail.com

.

**ln [C]**

**Time / s**

**Figure S1.** Dye discoloration kinetics exposed to active chlorine.


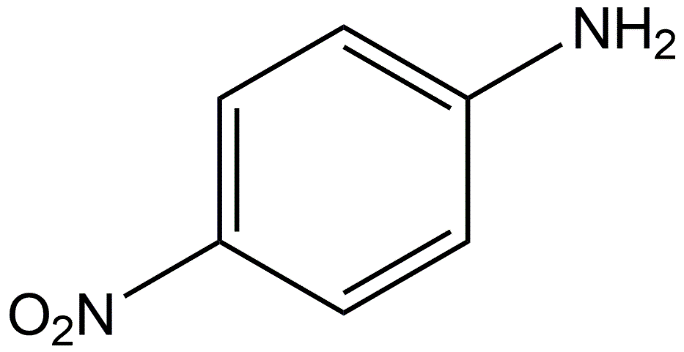


Figure S2. Extracted ion chromatogram (XIC) of the two transitions to 4-nitroaniline in the sample experiment of a solution dye stored for 14 days.

**a**

**b**

**Figure S3**. Metabolite (1) obtained from the photolysis of the AB210. a) Extracted ion chromatogram (XIC) *m/z* 742 ([M + H] +). b) MS/MSmass spectrum of the product formed, *m/z* 742.

**a**

**b**

**Figure S4**. Metabolite (2) obtained from the photolysis of the AB210. a) Extracted ion chromatogram (XIC) *m/z* 876 ([M + H] +). b) MS/MSmass spectrum of the product formed, *m/z* 876.

**Figure S5**. Extracted ion chromatogram (XIC) *m/z* 139 ([M + H] +) obtained from the photolysis of the AB210.

Table S1. Optimized experimental conditions for aromatic amines and degradation subproducts analysis.

| **Optimized conditions by LC-MS/MS** | | | |
| --- | --- | --- | --- |
| Analysis time (min) | Fluxo (uL min-1) | A (%) H2O + 0.1% formic acid | B (%) ACN + 0.1% formic acid |
| 0 | 1500 | 95 | 5 |
| 1 | 1500 | 95 | 5 |
| 5.5 | 1500 | 91 | 9 |
| 6.5 | 1500 | 75 | 25 |
| 9.5 | 1500 | 60 | 40 |
| 11.5 | 1500 | 54.5 | 45.5 |
| 16.5 | 1500 | 39.5 | 60.5 |
| 18.5 | 1500 | 0 | 100 |
| 23 | 1500 | 0 | 100 |
| 23.5 | 1500 | 95 | 5 |
| 30 | 1500 | 95 | 5 |

**Table S2.** Aromatic amines were investigated under the experimental conditions given in section 2.4 by LC-MS/MS.

| **Aromatic amines** | **Precursor Ion**  **(*m/z*)** | **Fragment Ion**  **(*m/z*)** | **Retention Time**  **(min)** |
| --- | --- | --- | --- |
| 4,4'-Oxydianiline | 201.1 | 108.2 | 9.48 |
| 201.1 | 80 |
| Aniline | 94 | 77.1 | 3.43 |
| 94 | 51 |
| 4-chloroaniline | 128 | 93.2 | 9.44 |
| 128 | 75.1 |
| 2-methylaniline | 227.2 | 120.1 | 14.6 |
| 227.2 | 77 |
| 4,4'-methylenebis | 267.1 | 140.2 | 13.7 |
| 267.1 | 231.3 |
| 2,6-dichlorobenzoquinone | 177.1 | 149.3 | 12.4 |
| 177.1 | 121.2 |
| 2-methyl-5-nitroaniline | 153.1 | 107.2 | 10.8 |
| 153.1 | 89.1 |
| 2,4-diaminotoluene | 123.1 | 106.1 | 3.2 |
| 123.1 | 108.2 |
| 4,4'-diaminodiphenyl | 217.1 | 124.1 | 11.6 |
| 217.1 | 80.2 |
| 2,5-methoxymethylaniline | 138.1 | 123.1 | 9.4 |
| 138.1 | 122.6 |
| 2,6-dimethylaniline | 122.1 | 105.2 | 4.7 |
| 122.1 | 77.1 |
| 5-aminobiphenyl | 170.1 | 152.2 | 12.7 |
| 170.1 | 153.2 |
| 2-chloro-4-nitroaniline | 173.1 | 156.2 | 11.7 |
| 173.1 | 126.1 |
| 2,5-dichloroaniline | 163.1 | 100 |  |
| 163.1 | 127 |  |
| 4-nitroaniline | 139.1 | 122.2 | 9.6 |
| 139.1 | 92.2 |
| 4-chloro-2-methylaniline | 142.1 | 107.2 | 11.2 |
| 142.1 | 106.6 |
| 4-Aminophenol | 110 | 65.2 | 1.7 |
| 110 | 93.2 |
| 4,4'-diaminodimethane | 199.2 | 106.3 | 11.5 |
| 199.2 | 77.2 |
| Methylanthranilate | 152 | 120.2 | 10.6 |
| 152 | 92.2 |
| 2-Naphtilamine | 144.1 | 127.2 | 7.2 |
| 144.1 | 77.2 |
| N-Nitrosodiphenyl | 199.1 | 169.3 | 13.9 |
| 199.1 | 66 |
| Auramine | 268.2 | 147.3 | 21.2 |
| 268.2 | 131.3 |
| Phenylenediamine | 109.1 | 92.2 | 1.61 |
| 109.1 | 65 |
| o-Toluidine | 108.1 | 91.2 | 6.75 |
| 108.1 | 93.2 |
| 4-amino-acetanilide | 151.1 | 109.2 | 2.07 |
| 151.1 | 92.2 |
| o-Tolidine | 213.2 | 180.3 | 11.3 |
| 213.2 | 196.1 |
| Benzidine_1 | 185.1 | 168.2 | 7.5 |
| 185.1 | 167.5 |
| 3,3'-dichlorobenzidine | 253.2 | 217.1 | 13.2 |
| 253.2 | 182 |
| 4-Aminoazobenzene | 198.1 | 77.1 | 12.9 |
| 198.1 | 51.1 |
| o-Dianisidine | 245.2 | 187.2 | 11.4 |
| 245.2 | 230.1 |
| o-Anisidine | 124 | 109.2 | 6.1 |
| 124 | 80.1 |
| 4-methylthioaniline | 140.1 | 93.2 | 9.01 |
| 140.1 | 125.1 |
| Isoquinoline | 130 | 77.1 | 7.6 |
| 130 | 103.2 |
| FastGarnet | 226.2 | 91.1 | 15.2 |
| 226.2 | 65.1 |
| N-Nitrosodipropylamine | 131.1 | 89.1 | 10.1 |
| 131.1 | 73.1 |
| 4-methoxylphenol | 125 | 110.1 | 6.1 |
| 125 | 93.1 |
| Hydrazobenzol | 185.2 | 168.3 | 7.5 |
| 185.2 | 167.2 |

**Table S3**. NMR data (**δ** in ppm) of compounds identified in treated and untreated wastewater from the leather industry.

| **Compounds / Structures** | **δ 1H** | **δ 13C** | **δ1H-13C HMBC** |
| --- | --- | --- | --- |
| *2-Naphthylamine* | 1 – | 142.1 |  |
| 3 – | 134.1 |  |
| 4 – | 126.7 |  |
| 5 – 7.94 | 128.4 | 114.8; 142.1 |
| 6 – 6.66 | 114.8 |  |
| 7,8 – 8.34 | 125.2 | 123.0; 128.4; 134.1; 142.1 |
| 9 – 7.88 | 122.8 | 125.2; 142.1 |
| 10 – 7.96 | 129.7 |  |
| *Cresol* | 1 – | 154.9 |  |
| 2,6 – 6.65 | 115.2 |  |
| 3,5 – 6.96 | 129.7 | 154.9;115.2;20.0 |
| 4 – | 128.3 |  |
| 7 – 2.25 | 20.0 |  |
| *Phenol* | 1 – | 157.2 |  |
| 2,6 – 6.79 | 115.0 | 129.1;119.1;157.2 |
| 3,5 – 7.16 | 129.1 |  |
| 4 – 6.79 | 119.3 |  |
| *Benzene* | 1-6 – 7.16 | 1-6 – 126.8 |  |
| *Phenylpropanoic acid* | 1 – | 176.6 |  |
| 2 – 2.94 | 37.2 | 141.6;176.6 |
| 3 – 2.55 | 31.6 | 141.6;176.6 |
| 4 – | 141.6 |  |
| 5,9 – 7.21 | 127.6 | 31.6;126.7 |
| 6,8 – 7.15 | 127.6 |  |
| 7 – 7.15 | 126.7 |  |
| *Phenylacetic acid* | 1 – | 176.1 |  |
| 2 – 3.57 | 42.8 | 129.1;136.0;176.1 |
| 3 – | 136.5 |  |
| 4,8 – 7.25 | 128.3 |  |
| 5,7 – 7.27 | 128.3 |  |
| 6 – 7.15 | 126.3 |  |
| *Naphthalene* | 1,6 – | 134.1 |  |
| 2,5,7,10 – 7.92 | 128.6 |  |
| 3,4,8,9 – 7.56 | 126.3 | 134.1;128.6 |
| *Acetic acid* | 1 – | 175.0 |  |
| 2 – 2.01 | 20.8 | 175.0 |
| *Formic acid* | 1 – 8.54 | 173.2 |  |
